# Supplementary material for: Conformal sulfated zirconia monolayer catalysts for the one-pot synthesis of ethyl levulinate from glucose
Source: Royal Society of Chemistry journal article supplement (doi:10.1039/c4cc04594g), 2014-01-01
Supplement: c4cc04594g1.pdf [file c4cc04594g1.pdf]

## SUPPLEMENTARY INFORMATION

### Conformal sulfated zirconia monolayer catalysts for the one-pot synthesis of ethyl levulinate from glucose

#### SI-1 Experimental

##### *Catalyst Preparation*

The primary goal of this preparation method was synthesis of uniformly coated  $\text{ZrO}_2/\text{SBA-15}$  materials exhibiting high dispersion and accessibility of zirconium using a layerwise deposition method to minimize growth of large crystallites. SBA-15 was prepared the original method by Zhao et al.<sup>1</sup> First 10g of SBA-15 was dried at 300°C for 4 hours. Then the dried SBA-15 and 58.5g of zirconium precursor (70% zirconium propoxide in propanol, Sigma-Aldrich) were added to 300ml of dry hexane in a round bottom flask. The amount of zirconium precursor is based on the number of hydroxyl groups of SBA-15 calculated according to thermal gravimetric analysis. So that each hydroxyl group could react with zirconium propoxide and a uniform layer would graft on SBA-15. The mixture was refluxed at 69°C overnight and then filtered and washed 3 times with hexane in order to remove any unreacted precursor. Afterwards, the material was rehydrated by adding it to 300ml deionized water under stirring for 4h to fully hydrolyze any residual propoxide groups. Finally the catalyst was filtered and dried at 80°C overnight. To get SBA-15 with 2 and 3 monolayers, the same procedure was repeated 2 and 3 times respectively. A subsequent step of sulphation with  $\text{H}_2\text{SO}_4$  was made by adding the  $\text{ZrO}_2/\text{SBA-15}$  catalysts to a 0.075M aqueous sulphuric acid solution (volume 10 ml acid per g sample) for 5h, after which the sample was filtered and dried at 80°C overnight. As a final step of preparation, the materials were calcined at 550°C for 3h.

##### *Catalyst Characterization*

Textural properties of the catalysts were evaluated through nitrogen adsorption-desorption isotherms recorded at 77 K using a Micromeritics TRISTAR 3000 system. Surface area values were calculated from isotherm data using the BET method and pores sizes distributions were obtained using the BJH method using a Harkins-Jura type equation specifically fitted for SBA-15 materials.<sup>2</sup> Total pore volume was assumed to be that recorded at  $P/P_0 = 0.975$ . Structural ordering was evaluated by means of low-angle X-ray powder diffraction (XRD) on a PHILIPS X'PERT diffractometer using the  $\text{Cu K}\alpha$  line in the  $2\theta$  angle range from  $0.6^\circ$  to  $5.0^\circ$  with a step size of  $0.02^\circ$ . The presence of crystalline domains of Zr and/or Si species was evaluated by high-angle XRD analysis, in the  $2\theta$  angle range from  $5.0^\circ$  to  $50.0^\circ$  (step size of  $0.04^\circ$ ). Structural characterization was completed by transmission electron microscopy (TEM) on a PHILIPS TECNAI-20T electronic microscope operating at 200kV, whereas particle morphology was evaluated by scanning electron microscopy (SEM) on a PHILIPS XL 30 ESEM electronic microscope. Bulk zirconium contents were determined by Inductively Coupled Plasma-Optical Emission Spectroscopy (ICP-OES) with a VARIAN VISTA AX apparatus. X-ray Photoelectron Spectroscopy (XPS) measurements were performed using a Kratos Axis HSi photoelectron spectrometer equipped with a charge neutralizer and a  $\text{Mg K}\alpha$  X-ray source ( $h\nu = 1253.6 \text{ eV}$ ). Spectra were recorded at normal emission using an analyzer pass energy of 20 eV and X-ray power of 225 W.  $\text{ZrO}_2$  film thicknesses were calculated from the attenuation of the Si 2p signal using the following equation, where  $I$  is the peak intensity,  $\lambda$  is the inelastic mean free path taken to be 1.26 nm for Si 2p photoelectrons,  $d$  the film thickness and  $\theta$  the angle of photo electron emission

$$I = I_0 \exp(-d/\lambda \cos\theta)$$

XRD patterns were recorded on a Panalytical X'pert-Pro diffractometer fitted with an X'celerator detector, using  $\text{Cu K}\alpha$  ( $1.54 \text{ \AA}$ ) sources with a nickel filter, calibrated against Si standards. Measurements of enthalpy of adsorption and acid sites content were carried out via flow adsorption calorimetry of  $\text{NH}_3$  followed by Thermal Programmed Desorption (TPD) on a Setaram DSC111 system connected to gas flow and switching systems. Samples were outgassed at 450°C under flowing  $\text{N}_2$  ( $10 \text{ ml min}^{-1}$ ) for 2 h prior to pulse titration at 150°C. Gas flow rates were controlled by automated mass flow controllers. The sample (15-25 mg) was held on a glass frit in a vertical silica glass sample tube in the calorimeter. A steady  $10 \text{ ml min}^{-1}$  flow of  $\text{N}_2$  was maintained across the sample for 3 h at 150°C to effect activation. A sequence of 10 probe gas pulses (1% of probe gas in  $\text{N}_2$ ) were delivered to the carrier gas stream from a 2 ml sample loop for  $\text{NH}_3$  using a two position Valco valve with an automated micro-electric actuator. Heat output associated with interaction between the probe gas and the sample was detected by DSC, and the concentration of  $\text{NH}_3$  in the gas flow downstream of the DSC was measured with a HPR 20 Hiden MS gas analyzer via a heated capillary at 175°C. A pulse delay of 90 min for  $\text{NH}_3$  was employed to allow reversibly adsorbed probe gas to desorb back into the pure  $\text{N}_2$  stream and/or redistribute on the sample, and for baselines to stabilize.

Thermal Programmed Desorption consisted in increasing the temperature from 150°C to 400°C at 5°C min<sup>-1</sup> followed by a hold of 1h at 400°C.

Ex-situ pyridine adsorption was performed by exposure of diluted samples (10wt% in KBr) to pyridine vapour in a desiccator overnight. Excess physisorbed pyridine was removed in a vacuum oven prior to sample loading in the environmental cell, with Diffuse Reflectance Infra-red Fourier Transform (DRIFT) spectra recorded at 25 °C in vacuo. The spectra were obtained using a Nicolet Avatar 370 MCT with Smart Collector accessory, mid/near infrared source and mercury cadmium telluride (MCT-A) photon detector at -196 °C (liquid N<sub>2</sub>). Then samples were then loaded into an environmental cell and subjected to additional drying under vacuum at 50 °C for 10 min prior to measurements to remove moisture physisorbed during air exposure.

### Catalytic tests

**Chemicals:** Glucose (99.5% purity), ethyl levulinate (99% purity) and 1,4-butanediol (99% purity) were purchased from Sigma-Aldrich. Methanol (99.8% purity), ethanol (99.9% purity) and 2-propanol (99% purity) were obtained from Scharlau.

**Reaction procedure:** Catalytic runs were carried out in liquid phase with a stirred stainless-steel 20 mL autoclave under autogenous pressure. Stirring was fixed for all the experiments at 500 rpm and the reaction time was set at 24 hours. Reaction temperature, ranging from 110 to 170 °C, was controlled using a thermocouple immersed in the reaction mixture. Reaction media composition: 0.25g of glucose; 2/1 glucose/catalyst mass ratio; 1/100 glucose/alcohol molar ratio. The screening of the different alcohols was carried out under the optimized reaction conditions.

**Analysis procedure:** Reaction samples were analyzed by GC (Varian 3900 gas chromatograph) using a ZB-WAX Plus column (30 m x 0.53 mm, DF=1.00 µm) and a FID detector. Reaction products detected by GC included alkyl levulinates but ethers coming from the intermolecular dehydration of alcohols, or other by-products were not observed under the relatively moderate reaction conditions tested in this work. The quantification of the alkyl levulinate was obtained using commercial EL to calculate the corresponding response factor. In order to calculate glucose conversion, reaction samples were also analyzed by high-pressure liquid chromatography (HPLC; Varian ProStar) using a Hi-Plex H<sup>+</sup> column and a refractive index detector (Varian 356-LC). A flow rate of 0.6 mL/min of 0.005 M aqueous sulphuric acid was used as eluent, keeping the column temperature at 60°C. Catalytic results are shown in terms of alkyl levulinate yield based on the chromatographic quantification of the alkyl levulinate (AL) remaining after the reaction using the following equation:

$$Y_{AL} = \frac{\text{formed mol of Alkyl Levulinate}}{\text{starting mol of glucose}} \times 100$$

## SI-2 Results

### N<sub>2</sub> adsorption-desorption isotherms

One of the deficiencies of zirconia-based catalysts is the low surface area which results in limited interface and therefore most of metal sites are located inside the zirconia crystals, being not accessible by the reactant molecules. Designing a zirconia-based catalyst with extended surface area is therefore of great interest. N<sub>2</sub> adsorption-desorption experiments have been included in Fig. 1a. All of the samples exhibit type IV adsorption isotherms, typical of mesoporous materials such as SBA-15. The steep H1 hysteresis loops match with the existence of uniform pores for all of the samples, although their sizes decrease as the zirconium loadings increase. This trend suggests that the incorporation of Zr species mainly occurs onto the surface of mesopores, thus leading to the thickening of the mesopores walls and to the reduction of the void volume of the mesostructured porous system. These differences can be better observed through the analysis of the N<sub>2</sub> adsorption-desorption isotherms by means of the t-plot method<sup>3</sup>, whose results have been included in Table S1.

**Table S1.** Surface area, pore volume and pore size of SBA-15 and SZ/SBA-15 samples as a function of nominal ZrO<sub>2</sub> monolayer.

| Sample        | Total pore volume <sup>a</sup><br>/cm <sup>3</sup> ·g <sup>-1</sup> | Surface area <sup>b</sup><br>/m <sup>2</sup> ·g <sup>-1</sup> | Pore size <sup>c</sup><br>/Å |
|---------------|---------------------------------------------------------------------|---------------------------------------------------------------|------------------------------|
| SBA-15        | 0.964                                                               | 647                                                           | 75                           |
| 1ML-SZ/SBA-15 | 0.655                                                               | 437                                                           | 71                           |
| 2ML-SZ/SBA-15 | 0.474                                                               | 367                                                           | 63                           |
| 3ML-SZ/SBA-15 | 0.449                                                               | 321                                                           | 64                           |

<sup>a</sup> Total pore volume recorded at P/P<sub>0</sub>=0.975; <sup>b</sup> Calculated by the B.E.T. method; <sup>c</sup> Calculated as the maximum of the pores sizes distribution calculated by the B.J.H.-K.J.S. method;

**Table S2.** Textural properties attributed to the different porous systems in SBA-15 and SZ/SBA-15 samples as a function of nominal ZrO<sub>2</sub> monolayer.

| Sample        | V <sub>micropores</sub><br>/cm <sup>3</sup> ·g <sup>-1</sup> | V <sub>mesopores</sub><br>/cm <sup>3</sup> ·g <sup>-1</sup> | V <sub>macropores</sub><br>/cm <sup>3</sup> ·g <sup>-1</sup> | S <sub>micropores</sub><br>/m <sup>2</sup> ·g <sup>-1</sup> | S <sub>mesopores</sub><br>/m <sup>2</sup> ·g <sup>-1</sup> | S <sub>macropores</sub><br>/m <sup>2</sup> ·g <sup>-1</sup> |
|---------------|--------------------------------------------------------------|-------------------------------------------------------------|--------------------------------------------------------------|-------------------------------------------------------------|------------------------------------------------------------|-------------------------------------------------------------|
| SBA-15        | 0.073                                                        | 0.574                                                       | 0.317                                                        | 151                                                         | 249                                                        | 247                                                         |
| 1ML-SZ/SBA-15 | 0.061                                                        | 0.382                                                       | 0.212                                                        | 124                                                         | 150                                                        | 163                                                         |
| 2ML-SZ/SBA-15 | 0.055                                                        | 0.292                                                       | 0.127                                                        | 110                                                         | 161                                                        | 96                                                          |
| 3ML-SZ/SBA-15 | 0.045                                                        | 0.126                                                       | 0.278                                                        | 90                                                          | 136                                                        | 95                                                          |

The grafting of the Zr precursor onto the surface of the SBA-15 parent material leads to a strong reduction of the mesopores volume, which is accentuated insofar as the amount of grafted zirconia onto the final material increases. This trend is accompanied by a great decreasing in the surface attributed to the mesostructured porous system, though in this case the reduction is not so progressive, mainly occurring during the grafting of the first zirconia layer. This behavior evidences that the incorporation of Zr is mainly occurring onto the surface of the mesopores. As for the microporous system, this is not greatly affected, at least not as much as the mesoporous system. Nevertheless, both the micropore volume and the surface area are diminished. With regards to the macropores and external surface, incorporating zirconia to the mesostructured material leads to an overall reduction of pore volume and surface area, unless in the case of the incorporation of the third and last zirconia layer, where a strong increase of macroporous volume is observed. The generation of this external porous system could be caused by the agglomeration of different particles, thus leading to new interparticular porosity resulting from the voids between adjacent bound particles.

#### ***X-Ray powder Diffraction (XRD)***

Figure S1a presents low-angle diffraction patterns which evidence a major diffraction at  $2\theta \sim 1^\circ$ , and two less intense signals at  $2\theta \sim 1.7^\circ$  and  $1.9^\circ$  for all of the mesostructured samples. These diffractions can be attributed to the 100, 110 and 200 planar symmetries typical of a periodic mesoporous framework with a *pm6* hexagonal ordering. The X-ray diffraction patterns of the grafted samples were nearly identical to that of the support, verifying the retention of the pore structure even after grafting and sulfation.

#### ***Estimation of the pore wall thickness***

Table S3 displays the unit cell sizes ( $a_0$ ) calculated for the different materials assuming a hexagonal array of pores with *pm6* topology. Pore wall thickness has also been calculated, in this case as the difference  $a_0 - D_p$ , where  $D_p$  is the mean pore size calculated from N<sub>2</sub> adsorption-desorption experiments. Incorporating the successive layers of zirconium dioxide leads to a slight reduction in the unit cell size, probably because of the constriction of the mesoporous structure caused by the repeating calcination steps. However, the reduction of the pore size is more intense resulting in the thickening of the pore wall as the amount of Zr incorporated to the mesostructured material increases, confirming the preferential incorporation of the metal species onto the surface of the mesoporous system.

**Table S3.** Unit cell sizes and pore wall thickness calculated from XRD and N<sub>2</sub> adsorption-desorption analyses.

| Sample        | d <sub>100</sub><br>/Å | d <sub>110</sub><br>/Å | d <sub>200</sub><br>/Å | Unit cell size ( $a_0$ )<br>/Å | Pore size<br>/Å | Pore wall thickness ( $t_w$ )<br>/Å |
|---------------|------------------------|------------------------|------------------------|--------------------------------|-----------------|-------------------------------------|
| SBA-15        | 93.9                   | 54.5                   | 48.0                   | 109.4                          | 75              | 34.4                                |
| 1ML-SZ/SBA-15 | 90.0                   | 53.2                   | 46.0                   | 105.5                          | 71              | 34.5                                |
| 2ML-SZ/SBA-15 | 90.0                   | 52.5                   | 46.4                   | 105.4                          | 63              | 42.4                                |
| 3ML-SZ/SBA-15 | 88.2                   | 52.5                   | 46.0                   | 104.4                          | 64              | 40.4                                |

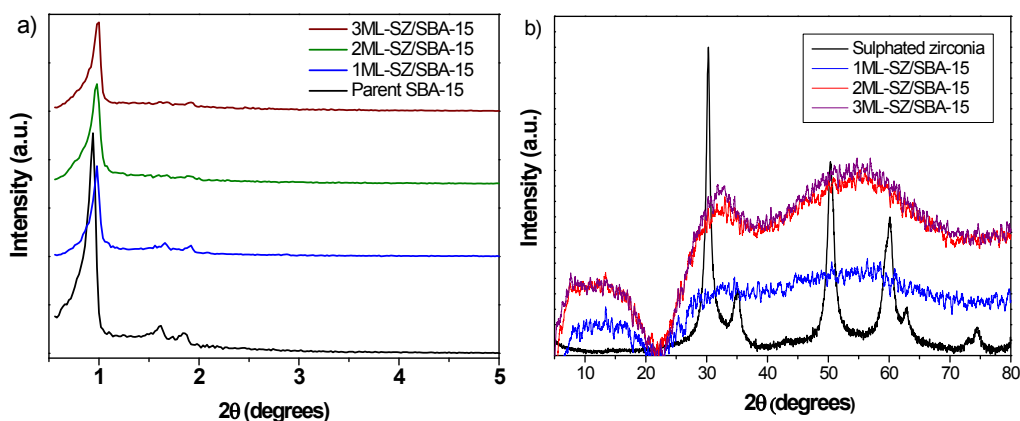

**Fig S1.** Powder X-ray diffractograms of SZ/SBA-15 materials as a function of nominal zirconium monolayer: a) Low-angle diffractograms, including the parent SBA-15 support; b) Wide angle diffractograms corrected by subtracting the SBA-15 support pattern, alongside a reference bulk sulphated zirconia.

### ***Transmission Electron Microscopy (TEM)***

The TEM analysis (Fig. S2) shows the diameter of the SBA-15 channels and confirm a good dispersion of Zr species on the silica pore surface, and the avoidance of  $\text{ZrO}_2$  clusters suggesting the formation of a uniform zirconia crystal layer on the silica surface after calcinations.

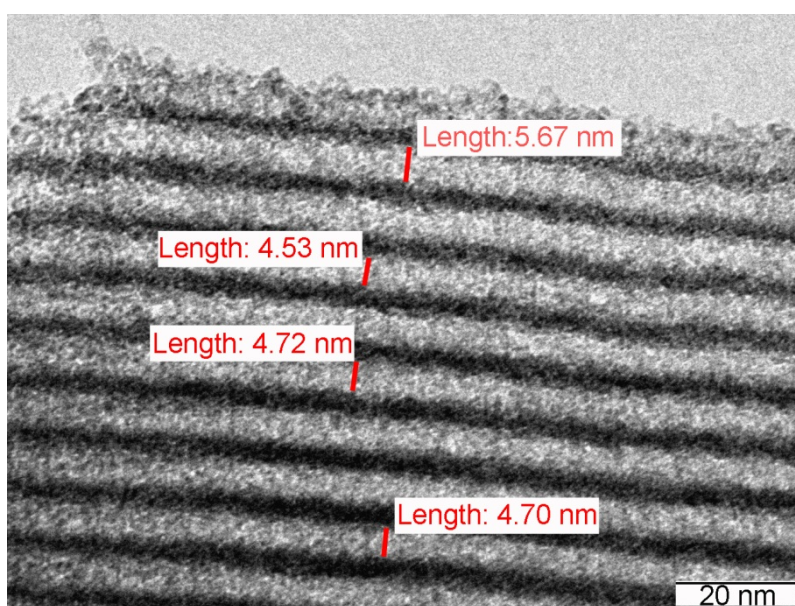

**Fig S2.** TEM image of 2ML-SZ/SBA-15.

**Atomic composition: X-ray Photoelectron Spectroscopy (XPS), Scanning Electron Microscopy (SEM) and Inductively Coupled Plasma-Optical Emission Spectroscopy (ICP-OES)**

Surface zirconium and sulphur contents were determined by XPS, whereas bulk contents were obtained by EDX and ICP (in this case only for Zr). **Table S4** shows the surface loading mirrors the bulk sulphur contents and exceeds it in all cases, consistent with surface specific grafting of zirconium and sulphur species over the SBA-15 framework.

**Table S4.** Surface and bulk compositions of SZ functionalized SBA-15 as a function of nominal zirconium monolayer.

| Surface composition from XPS |          |         |          |         |                   |                    | Bulk composition from EDX |         |          |         |                   |                    | Bulk composition from ICP-OES |
|------------------------------|----------|---------|----------|---------|-------------------|--------------------|---------------------------|---------|----------|---------|-------------------|--------------------|-------------------------------|
|                              | Si / wt% | O / wt% | Zr / wt% | S / wt% | S/Zr atomic ratio | Zr/Si atomic ratio | Si / wt%                  | O / wt% | Zr / wt% | S / wt% | S/Zr atomic ratio | Zr/Si atomic ratio | Zr / wt%                      |
| SBA-15                       | 38.9     | 61.1    | -        | -       | -                 | -                  | -                         | -       | -        | -       | -                 | -                  | -                             |
| 1ML-SZ/SBA-15                | 32.3     | 58.0    | 8.3      | 1.4     | 0.7               | 0.1                | 38.3                      | 54.7    | 6.0      | 1.0     | 0.5               | 0.05               | 7.1                           |
| 2ML-SZ/SBA-15                | 21.0     | 50.1    | 26.6     | 2.4     | 0.4               | 0.4                | 32.3                      | 47.0    | 19.0     | 2.0     | 0.3               | 0.18               | 17.4                          |
| 3ML-SZ/SBA-15                | 18.2     | 47.1    | 31.7     | 3.0     | 0.3               | 0.5                | 31.7                      | 46.3    | 20.4     | 1.7     | 0.2               | 0.20               | 20.4                          |

Plots of the surface Zr:Si against bulk Zr:Si show no change on sulfation (**Fig S3a**), confirming there is no sintering of the ZrO<sub>2</sub> overlayer. The surface S:Zr ratio remains above that of the bulk, again consistent with surface sulfation (**Fig S3b**). High resolution XP spectra for silicon, oxygen, zirconium and sulphur are shown in **Fig. S4**.

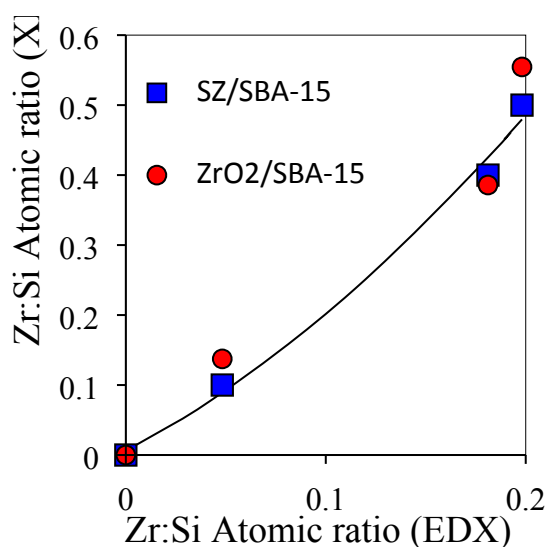

**Fig S3.** Plot of surface and bulk from XPS and EDX measurements for a) Zr:Si atomic ratios for ZrO<sub>2</sub>/SBA-15 and SZ/SBA-15 series and b) S:Zr ratios for SZ/SBA-15 materials

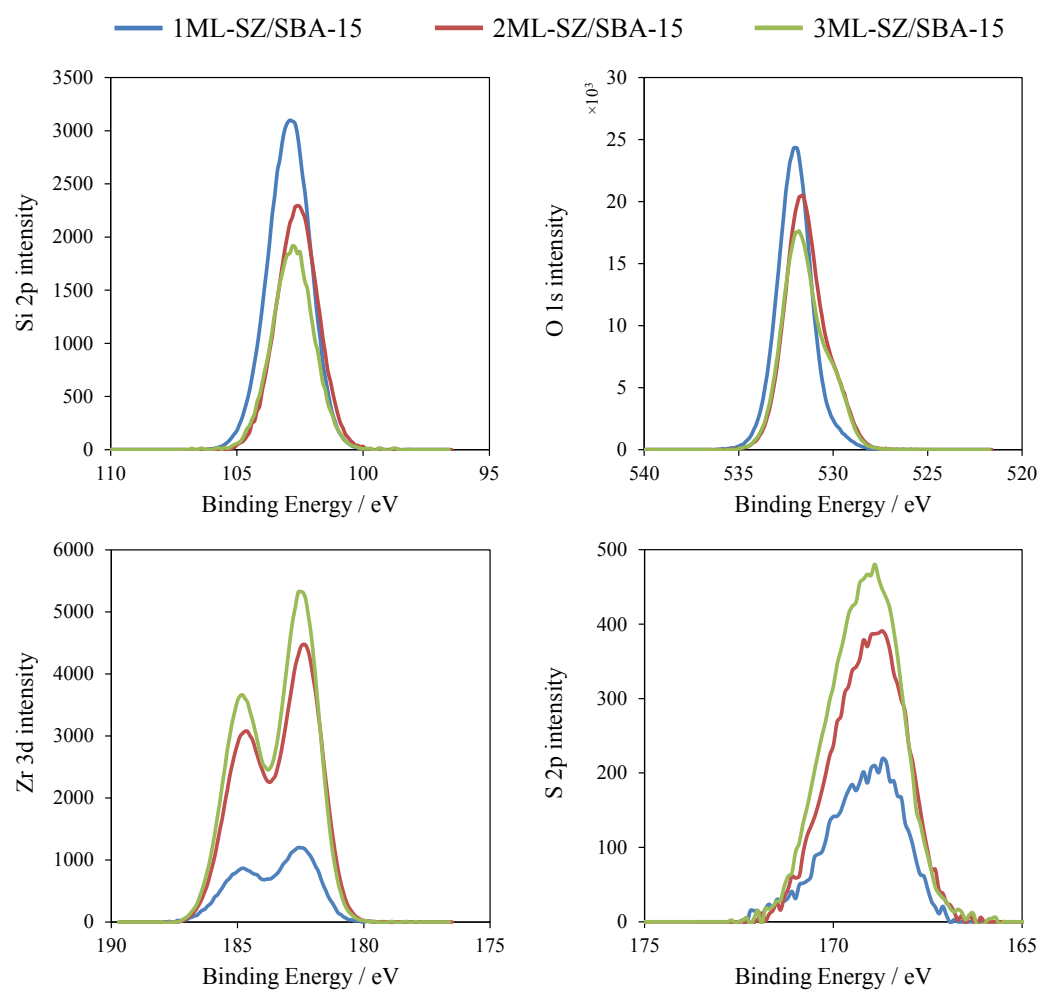

**Fig S4.** High resolution, background-subtracted silicon, oxygen, zirconium and sulphur XP spectra.

### Adsorption and desorption of ammonia by microcalorimetry

NH<sub>3</sub> adsorption calorimetry shows the different distribution of adsorption enthalpies as the SZ film increases from 1 to 3 ML (Fig. S5). 1 and 2 ML films both show a higher the initial enthalpy of adsorption which is attributed to strong Lewis sites. At 3ML these sites are diminished, with all samples exhibiting a NH<sub>3</sub> adsorption strength associated with strong Brønsted acid sites. These results correlate to the distribution of Lewis and Brønsted acid sites from pyridine titration.

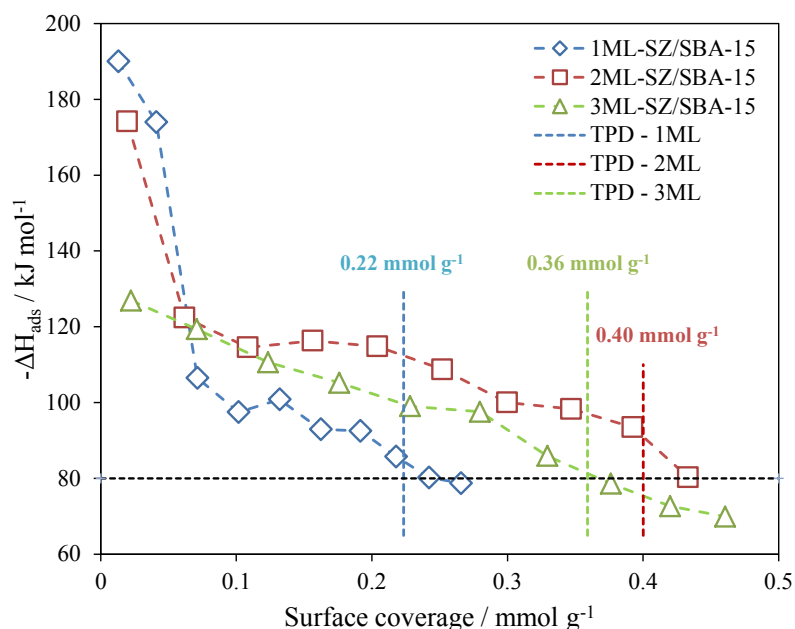

Fig S5. Adsorption enthalpies as a function of nominal zirconium monolayer.

NH<sub>3</sub>-TPD reveals the number of acid sites. From TPD data (Fig. S6) it can be observed that by grafting the second monolayer of zirconia on the support, the number of acid sites increases dramatically, but going from 2 to 3 monolayer causes a slight decrease. This could be attributed to formation of lumps of zirconia crystals and also pore-blocking, leading to a reduction of the accessibility of zirconium atoms for sulfate ions.

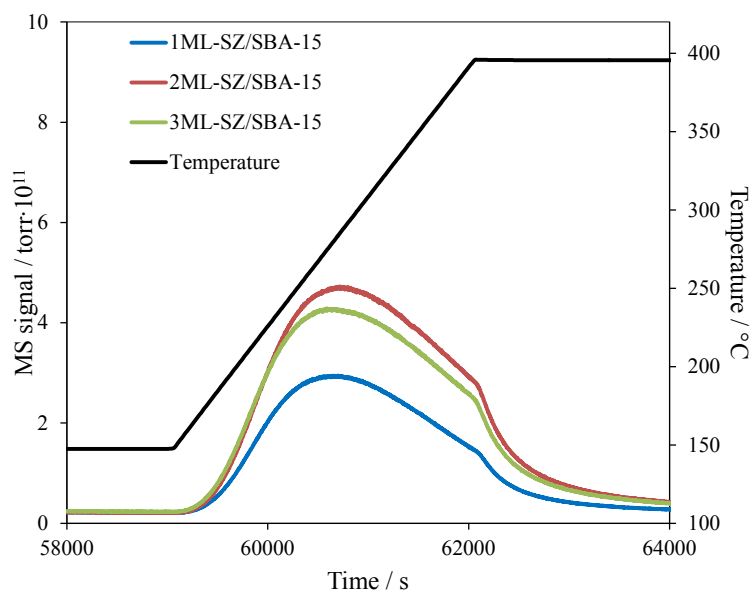

Fig S6. Ammonia Temperature Programmed Desorption (TPD) for SZ/SBA-15 materials.

**Table S5.** Acid site analysis from NH<sub>3</sub> pulse titration/calorimetry and TPD

|                                                                 | 1ML-SZ/SBA-15        |                                                  | 2ML-SZ/SBA-15        |                                                  | 3ML-SZ/SBA-15        |                                                  |
|-----------------------------------------------------------------|----------------------|--------------------------------------------------|----------------------|--------------------------------------------------|----------------------|--------------------------------------------------|
|                                                                 | mmol.g <sup>-1</sup> | - $\Delta H_{\text{ads}}$ / kJ.mol <sup>-1</sup> | mmol.g <sup>-1</sup> | - $\Delta H_{\text{ads}}$ / kJ.mol <sup>-1</sup> | mmol.g <sup>-1</sup> | - $\Delta H_{\text{ads}}$ / kJ.mol <sup>-1</sup> |
| Pulse 1                                                         | 0.01                 | 190.0                                            | 0.02                 | 174.2                                            | 0.02                 | 126.9                                            |
| Pulse 2                                                         | 0.04                 | 174.0                                            | 0.06                 | 122.4                                            | 0.07                 | 119.4                                            |
| Pulse 3                                                         | 0.07                 | 106.5                                            | 0.11                 | 114.6                                            | 0.12                 | 110.6                                            |
| Pulse 4                                                         | 0.10                 | 97.5                                             | 0.16                 | 116.3                                            | 0.18                 | 105.2                                            |
| Pulse 5                                                         | 0.13                 | 100.9                                            | 0.20                 | 114.8                                            | 0.23                 | 99.0                                             |
| Pulse 6                                                         | 0.16                 | 92.9                                             | 0.25                 | 108.8                                            | 0.28                 | 97.6                                             |
| Pulse 7                                                         | 0.19                 | 92.5                                             | 0.30                 | 100.1                                            | 0.33                 | 85.9                                             |
| Pulse 8                                                         | 0.22                 | 85.8                                             | 0.35                 | 98.3                                             | 0.38                 | 78.6                                             |
| Pulse 9                                                         | 0.24                 | 80.2                                             | 0.39                 | 93.5                                             | 0.42                 | 72.7                                             |
| Pulse 10                                                        | 0.27                 | 78.7                                             | 0.43                 | 80.3                                             | 0.46                 | 69.9                                             |
| Total acid site loading from calorimetry / mmol g <sup>-1</sup> | 0.24                 |                                                  | 0.43                 |                                                  | 0.37                 |                                                  |
| Total acid site loading from TPD / mmol g <sup>-1</sup>         | 0.22                 |                                                  | 0.40                 |                                                  | 0.36                 |                                                  |

***Infrared pyridine titration (FTIR-Pyridine)***

Infrared spectroscopic studies of pyridine adsorption on solid surfaces make possible to distinguish between Brønsted (1542 cm<sup>-1</sup>) and Lewis acid sites (1447 cm<sup>-1</sup>) (**Fig. S7**).<sup>3</sup>

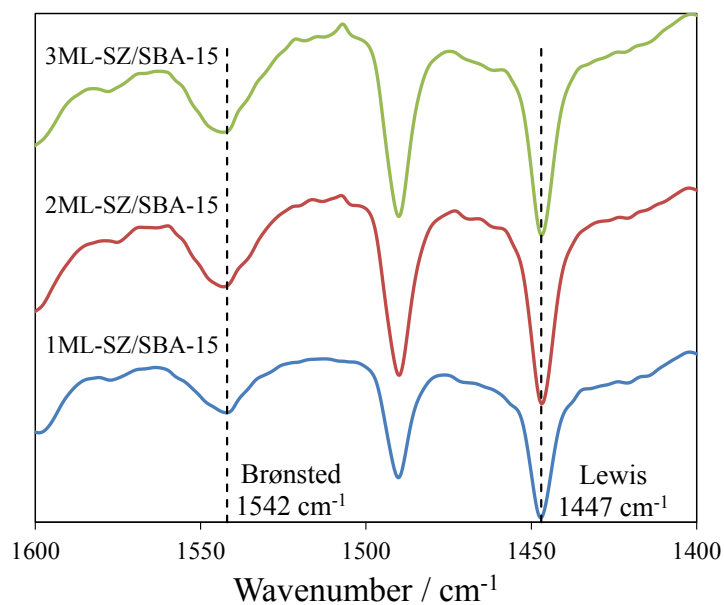**Fig S7.** Brønsted and Lewis acid sites of SZ/SBA-15 as a function of nominal zirconium monolayer.



*Catalyst reusability and alternative substrates*

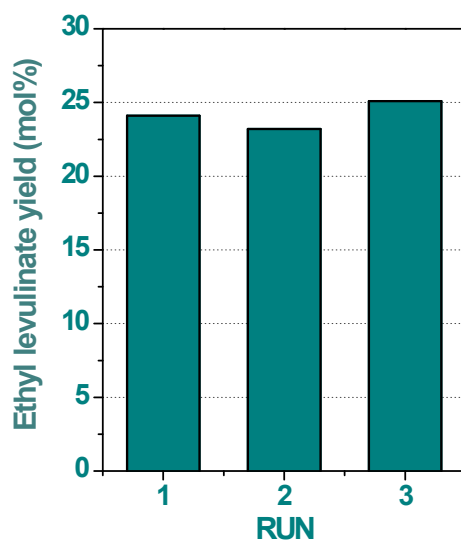

**Fig S8.** Reutilization assays. Catalyst 2ML-SZ/SBA-15. 140 °C, 24 h, 1

:100 glucose:ethanol molar ratio.

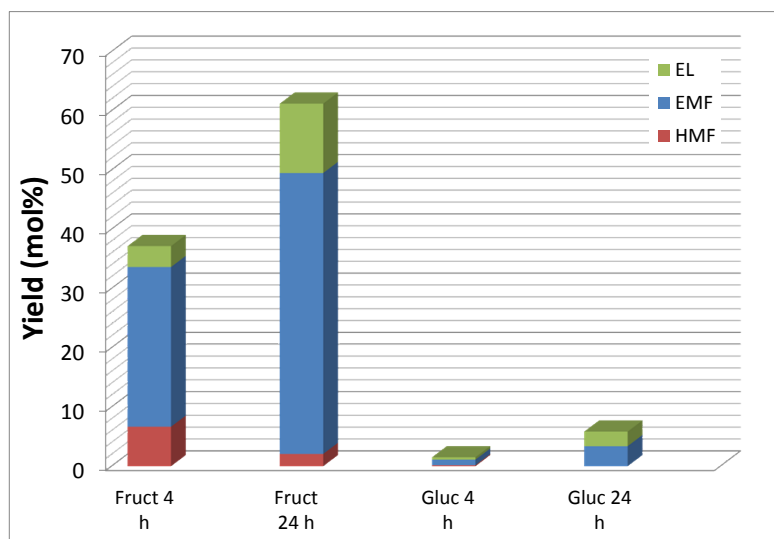

**Fig. S9.** Direct transformation of glucose or fructose into ethyl levulinate at 130 °C over 2 ML grafted SZ/SBA-15. Reaction conditions: 24 h; 0.25 g of glucose; 4:1 glucose:catalyst mass ratio; 1:100 glucose:EtOH molar ratio.

**Table S6.** Influence of reactant on EL yield

| Reaction substrate | Temp. (°C) | Substrate/Cat (mass ratio) | Time (h) | Yield to EL (mol%) | Yield to EMF (mol%) | Yield to HMF (mol%) |
|--------------------|------------|----------------------------|----------|--------------------|---------------------|---------------------|
| Glucose            | 140        | 2:1                        | 24       | 24.2               | 0.0                 | 0.0                 |
| Fructose           | 140        | 2:1                        | 24       | 33.7               | 0.0                 | 0.0                 |
| HMF                | 140        | 2:1                        | 24       | 20.8               | 0.0                 | 0.0                 |

Reaction conditions: 2ML-SZ-SBA-15 catalyst, 0.25 g of substrate; 1:100 substrate:EtOH molar ratio.

**Table S7.** Impact of ZrO<sub>2</sub> Lewis acid co-catalyst addition

| Reaction substrate | Temp. (°C) | Glucose/Cat (mass ratio) | Time (h) | Yield to EL (mol%) | Yield to EMF (mol%) | Yield to HMF (mol%) |
|--------------------|------------|--------------------------|----------|--------------------|---------------------|---------------------|
| Glucose            | 140        | 2:1                      | 24       | 30.7               | 0.0                 | 0.0                 |

Reaction conditions: 2ML-SZ-SBA-15 catalyst, ZrO<sub>2</sub> co-catalyst; 1/1 catalyst/co-catalyst mass ratio; 0.25g of glucose; 1/100 glucose/EtOH molar ratio.

### References:

1. D. Zhao, J. Feng, Q. Huo, N. Melosh, G. H. Fredrickson, B. F. Chmelka, G. D. Stucky, *Science*, 1998, **279**, 548-552.
2. R. van Grieken, G. Calleja, G.D. Stucky, J.A. Melero, R.A. García, J. Iglesias, *Langmuir*, 2003, **19**, 3966-3973.
3. C. K. Krishnan, T. Hayashi, M. Ogura, *Advanced Materials*, 2008, **20**, 2131–2136.
